# Supplementary material for: DNA methylation variations in familial female and male breast cancer
Source: PubMed Central journal article supplement — Oncol Lett. 2021 Apr 12;21(6):468. doi: 10.3892/ol.2021.12729 (PMC8063268; doi:10.3892/ol.2021.12729), 2021-04-12
Supplement: Supplementary_Data.pdf [file Supplementary_Data.pdf]

Data S1. MAT algorithm and DAVID parameters used in the performed comparisons.

MAT algorithm parameters used in the following comparison:

1. FBC (17 cases) vs. MBC (7 cases)  
MAT algorithm parameters: P-value threshold: 0.0001, sliding window: 1400 bp, minimum number of probes in a region: 10.
2. BRCAX FBC (10 cases) vs. BRCAX MBC (6 cases)  
MAT algorithm parameters: P-value threshold: 0.0001, sliding window: 1400 bp, minimum number of probes in a region: 10.
3. BRCAX (16 cases) vs. BRCA1/2 (8 cases)  
MAT algorithm parameters: P-value threshold: 0.0001, sliding window: 1400 bp, minimum number of probes in a region: 10.
4. BRCA1 (4 cases) vs. BRCA2 (3 cases)  
MAT algorithm parameters: P-value threshold: 0.0001, sliding window: 600 bp, minimum number of probes in a region: 10.
5. BRCA1(4 cases) vs. BRCAX (10 cases)  
MAT algorithm parameters: P-value threshold: 0.0001, sliding window: 600 bp, minimum number of probes in a region: 10.
6. BRCA2 (3 cases) vs. BRCAX (10 cases)  
MAT algorithm parameters: P-value threshold: 0.0001, sliding window: 600 bp, minimum number of probes in a region: 10.
7. BRCA1 (4 cases) vs. BRCA2 (3 cases) and BRCAX (10 cases)  
MAT algorithm parameters: P-value threshold: 0.0001, sliding window: 350 bp, minimum number of probes in a region: 10.
8. BRCA2 (3 cases) vs. BRCAX (10 cases) and BRCA1 (4 cases)  
MAT algorithm parameters: P-value threshold: 0.0001, sliding window: 350 bp, minimum number of probes in a region: 10.
9. BRCAX (10 cases) vs. BRCA2 (3 cases) and BRCA1 (4 cases)

MAT algorithm parameters: P-value threshold: 0.0001, sliding window: 350 bp, minimum number of probes in a region: 10.

DAVID parameters used in the following comparison:

A more stringent cut-off associated to DMR was applied to remove not relevant genes and reduced the list of DMRs and corresponding genes used for performing the functional enrichment analyses by DAVID.

1. FBC vs. MBC; cut-off: P-value<8.15x10<sup>-5</sup>.  
The list was reduced to 2846 DMRs corresponding to 2486 genes. David recognized 2395 genes.
2. BRCAX FBC vs. BRCAX MBC; cut-off: P-value<4.26x10<sup>-5</sup>.  
The list was reduced to 1242 DMRs corresponding to 1102 genes. David recognized 1050 genes.
3. BRCAX vs. BRCA1/2; cut-off not applied.  
David recognized 350 genes up to 357.
4. BRCA1 vs. BRCA2; cut-off: MAT score (absolute value)>3.94.  
The list was reduced to 802 DMRs corresponding to 755 genes. David recognized 723 genes.
5. BRCA1 vs. BRCAX; cut-off: MAT score (absolute value)>4.  
The list was reduced to 484 DMRs corresponding to 464 genes. David recognized 453 genes.
6. BRCA2 vs. BRCAX; cut-off: MAT score (absolute value)>4.2.  
The list was reduced to 673 DMRs corresponding to 629 genes. David recognized 613 genes.
7. BRCA1 vs. BRCA2 and BRCAX: P-value<6.78x10<sup>-5</sup>.  
The list was reduced to 861 DMRs corresponding to 819 genes. David recognized 797 genes.
8. BRCA2 vs. BRCA1 and BRCAX: P-value<6.78x10<sup>-5</sup>.  
The list was reduced to 1380 DMRs corresponding to 1251 genes. David recognized 1209 genes.
9. BRCAX vs. BRCA1 and BRCA2: P-value<6.78x10<sup>-5</sup>.  
The list was reduced to 962 DMRs corresponding to 914 genes. David recognized 888 genes.

Figure S1. Dot plots generated by Partek Genomic Suite represent the 20 most differentially methylated regions in FBC vs. MBC comparison. The average value of the probes contained in a differentially methylated region for a given breast cancer case is represented by a circle. Red and blue indicate FBC and MBC cases, respectively. The numbers on the y-axis are  $\Delta$  methylation values. FBC, female breast cancer; MBC, male breast cancer.

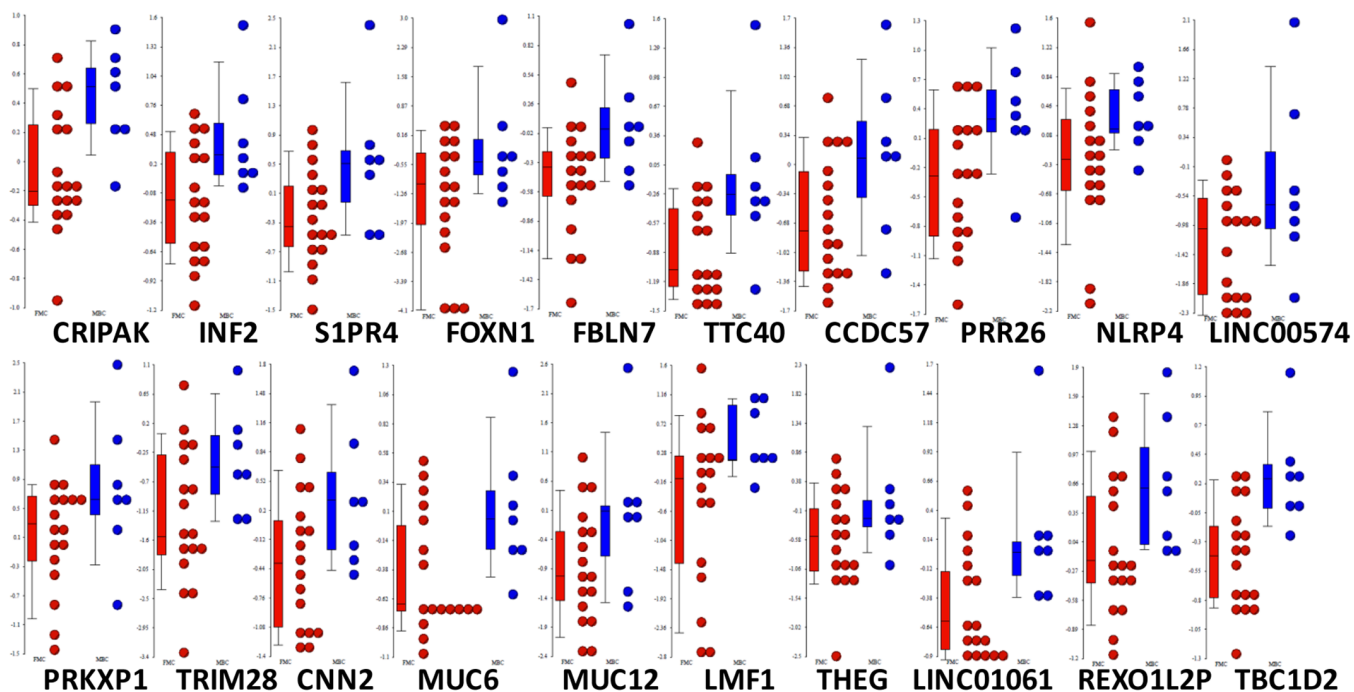

Figure S2. Dot plots generated by Partek Genomic Suite represent the 20 most differentially methylated regions in the FBC vs. MBC comparison (BRCA cases only). The average value of the probes contained in a differentially methylated region for a given breast cancer case is represented by a circle. Red and blue indicate FBC and MBC cases, respectively. The numbers on the y-axis are  $\Delta$  methylation values. FBC, female breast cancer; MBC, male breast cancer.

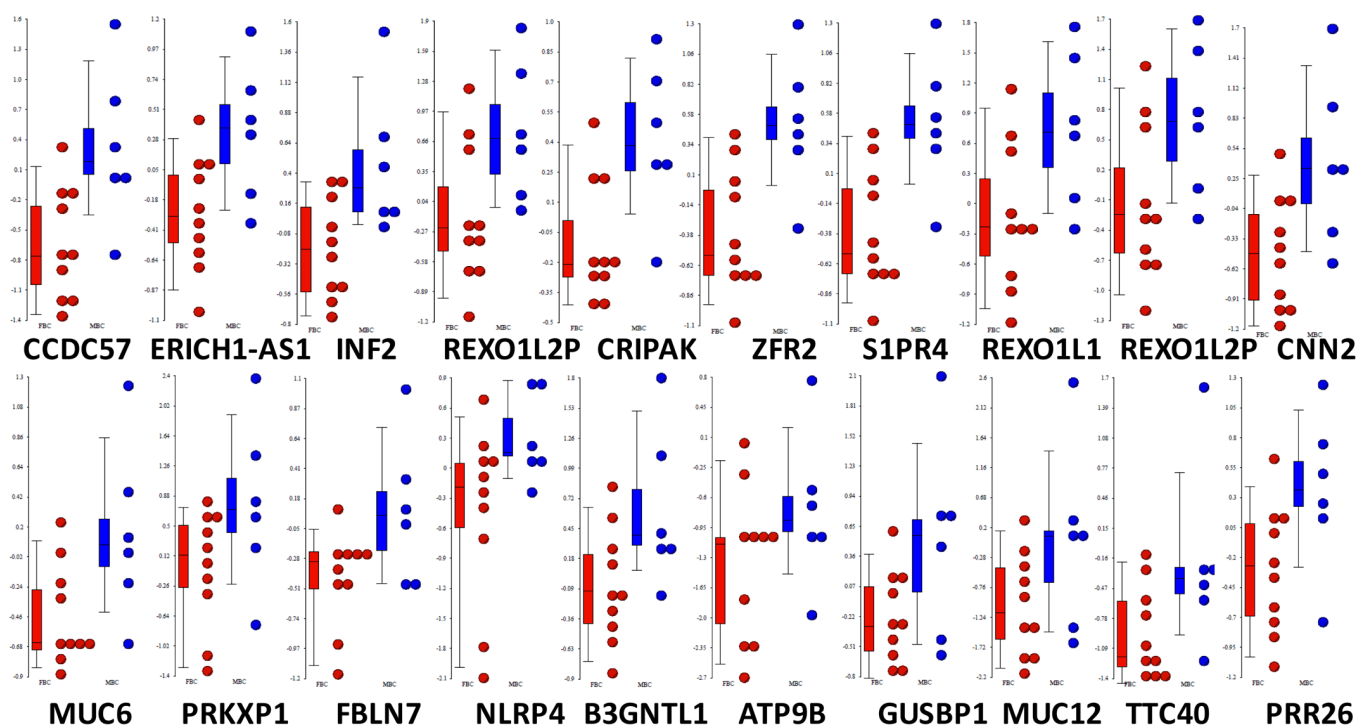

Figure S3. Dot plots generated by Partek Genomic Suite represent the 20 most differentially methylated regions in the BRCA1/BRCA2 vs. BRCA1/BRCA2 comparison. The average value of the probes contained in a differentially methylated region for a given breast cancer case is represented by a circle. Red and blue indicate BRCA1/BRCA2 and BRCA1/BRCA2 cases, respectively. The numbers on the y-axis are  $\Delta$  methylation values.

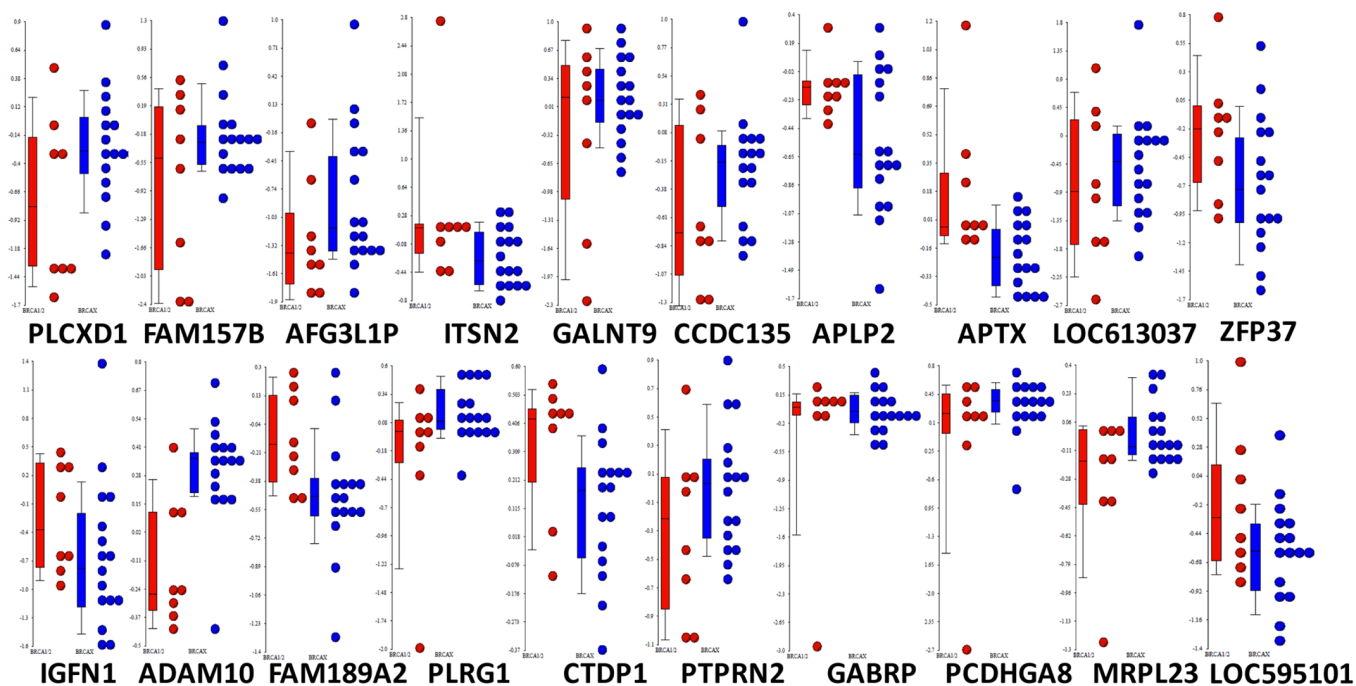

Figure S4. Dot plots generated by Partek Genomic Suite represent the 20 most differentially methylated regions in the BRCA1 vs. BRCA2 comparison (female breast cancer cases only). The average value of the probes contained in a differentially methylated region for a given breast cancer case is represented by a circle. Red and blue indicate BRCA1 and BRCA2 cases, respectively. The numbers on the y-axis are  $\Delta$  methylation values.

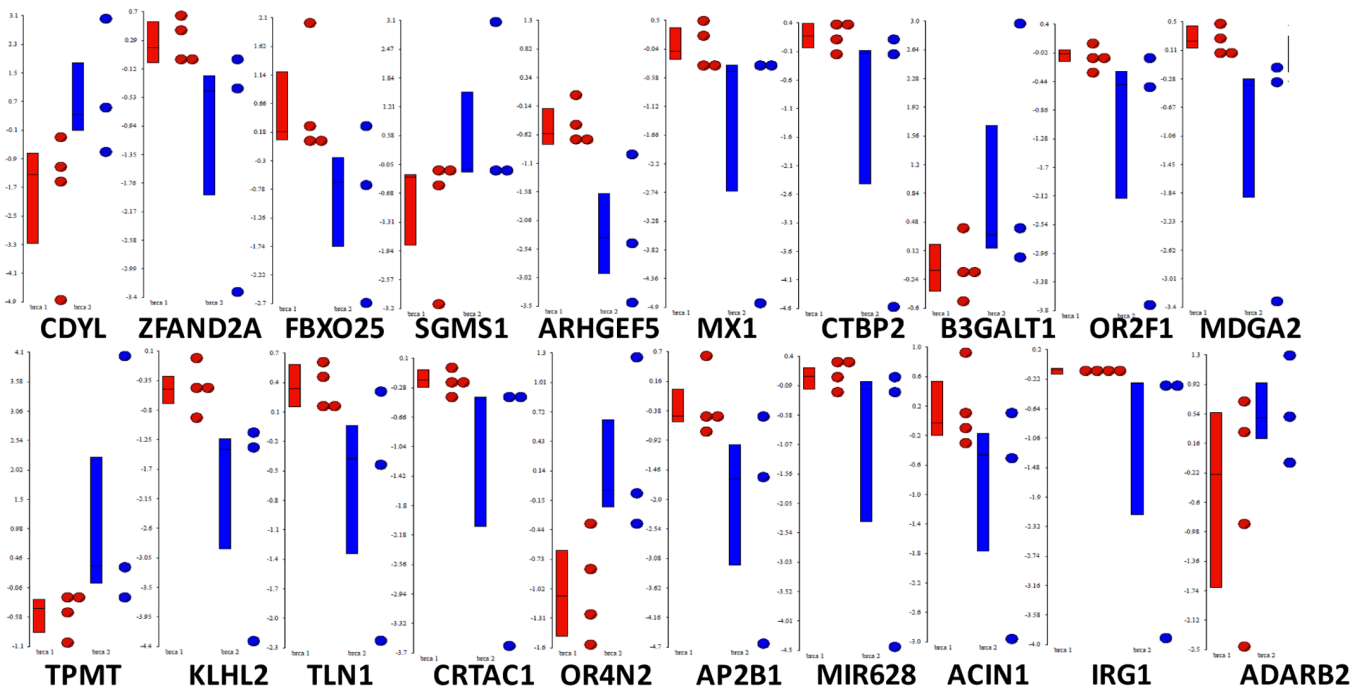

Figure S5. Dot plots generated by Partek Genomic Suite represent the 20 most differentially methylated regions in the BRCA1 vs. BRCA2 comparison (female breast cancer cases only). The average value of the probes contained in a differentially methylated region for a given breast cancer case is represented by a circle. Red and green indicate BRCA1 and BRCA2 cases, respectively. The numbers on the y-axis are  $\Delta$  methylation values.

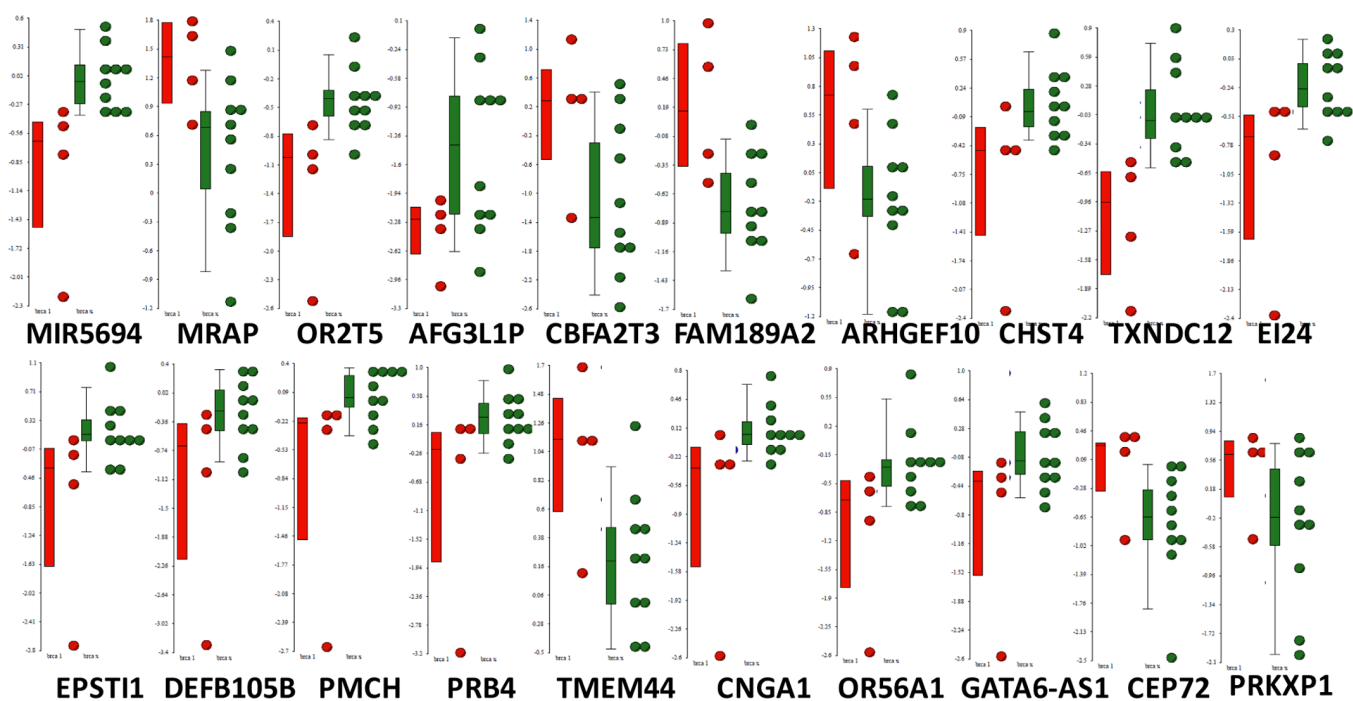

Figure S6. Dot plots generated by Partek Genomic Suite represent the 20 most differentially methylated regions in the BRCA2 vs. BRCAX comparison (female breast cancer cases only). The average value of the probes contained in a differentially methylated region for a given breast cancer case is represented by a circle. Blue and green indicate BRCA2 and BRCAX cases, respectively. The numbers on the y-axis are  $\Delta$  methylation values.

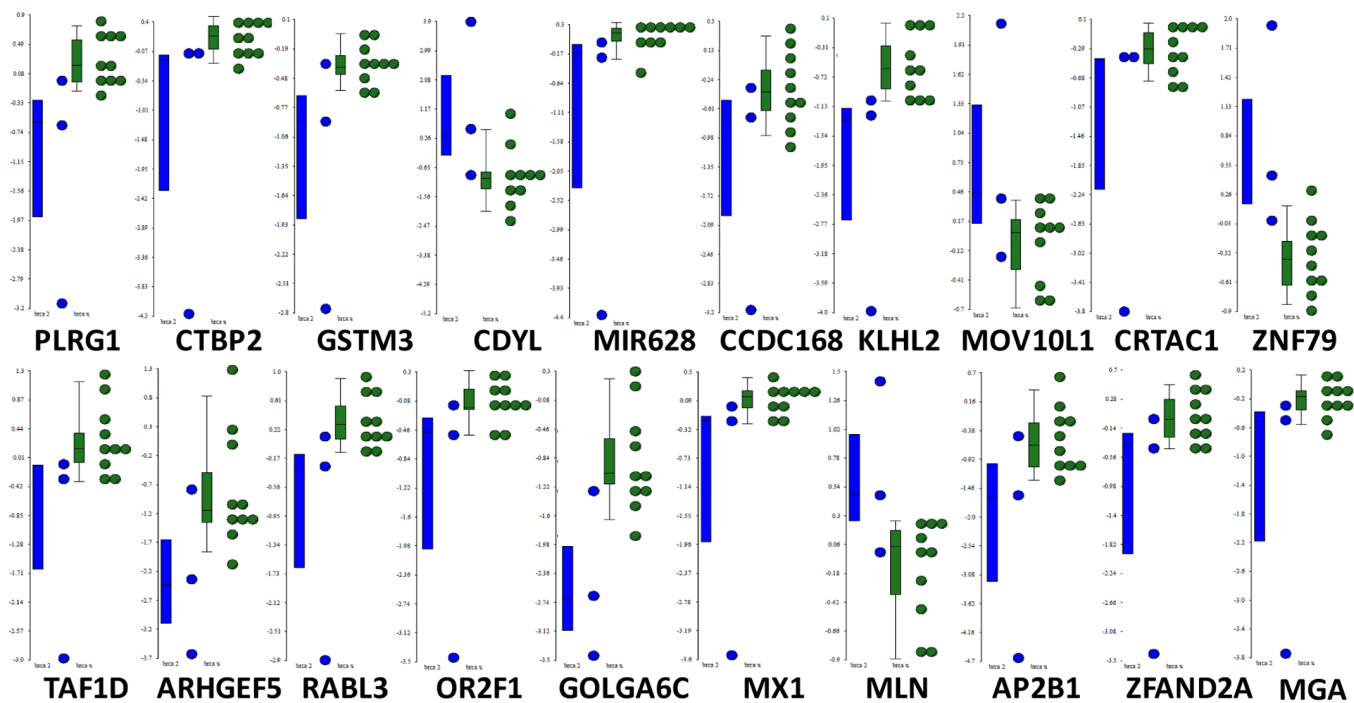

Figure S7. Dot plots generated by Partek Genomic Suite represent the 20 most differentially methylated regions in the BRCA1 vs. BRCA2/X comparison (female breast cancer cases only). The average value of the probes contained in a differentially methylated region for a given breast cancer case is represented by a circle. Red, blue and green indicate BRCA1, BRCA2 and BRCA1 cases, respectively. The numbers on the y-axis are  $\Delta$  methylation values.

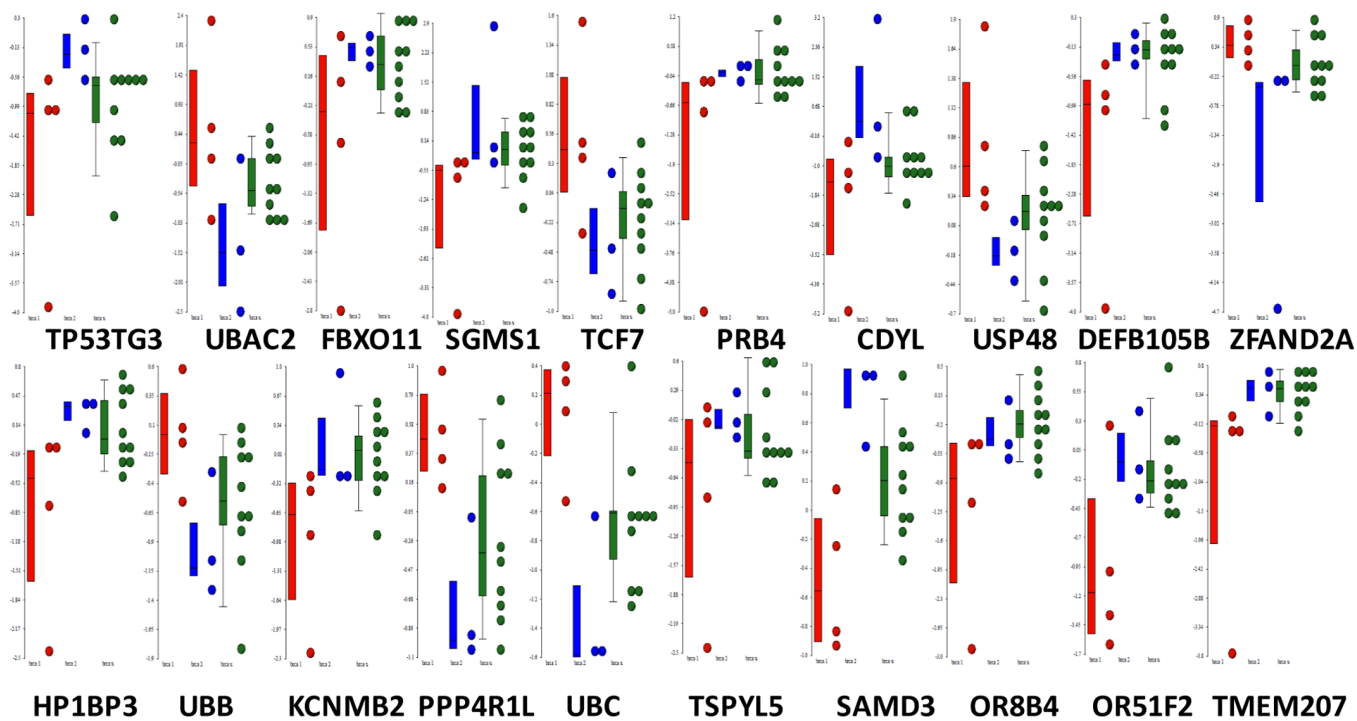



Figure S8. Dot plots generated by Partek Genomic Suite represent the 20 most differentially methylated regions in the BRCA2 vs. BRCA1/X comparison (female breast cancer cases only). The average value of the probes contained in a differentially methylated region for a given breast cancer case is represented by a circle. Red, blue and green indicate BRCA1, BRCA2 and BRCA1X cases, respectively. The numbers on the y-axis are  $\Delta$  methylation values.

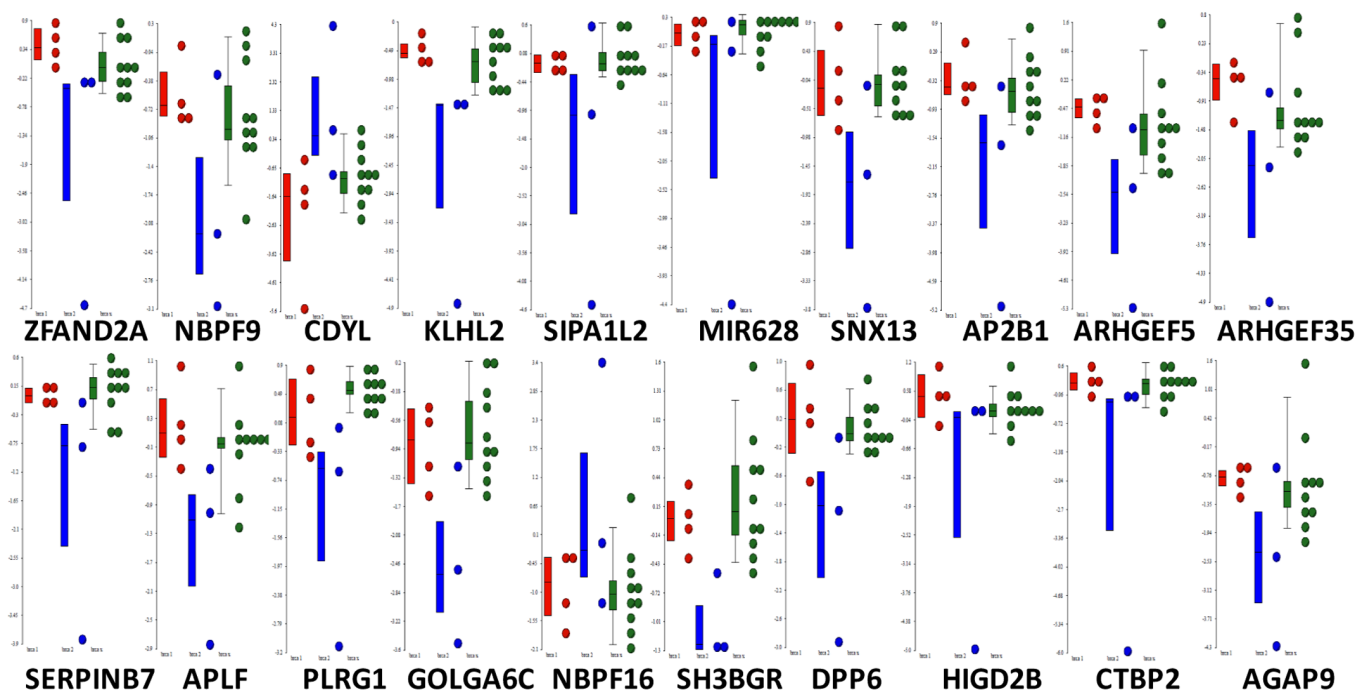

Figure S9. Dot plots generated by Partek Genomic Suite represent the 20 most differentially methylated regions in the BRCA1 vs. BRCA2 comparison (female breast cancer cases only). The average value of the probes contained in a differentially methylated region for a given breast cancer case is represented by a circle. Red, blue and green indicate BRCA1, BRCA2 and BRCA1/2 cases, respectively. The numbers on the y-axis are  $\Delta$  methylation values.

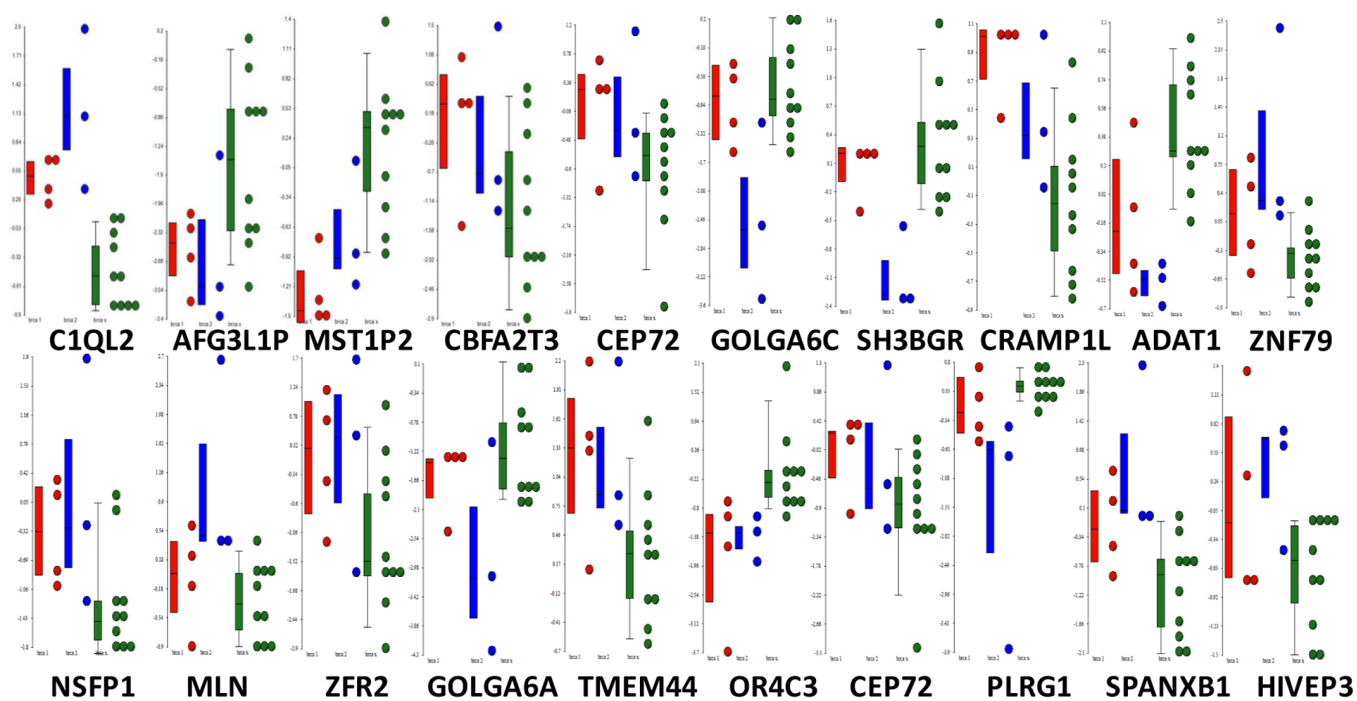

Table SI. Genes corresponding to the 20 most differentially methylated regions.

## A, Comparison N° 1: FBC vs. MBC (17 cases vs. 7 cases)

| Gene symbol | P-value               | MAT score | Chromosome | Region start at: | Region end at: | DMR length, bp | Probes in region | DMR position       |
|-------------|-----------------------|-----------|------------|------------------|----------------|----------------|------------------|--------------------|
| CRIPAK      | 1.42x10 <sup>-5</sup> | -12.052   | chr4       | 1378294          | 1383307        | 5014           | 131              | Promoter           |
| INF2        | 1.42x10 <sup>-5</sup> | -11.232   | chr14      | 104256668        | 104260009      | 3342           | 74               | Promoter           |
| S1PR4       | 1.42x10 <sup>-5</sup> | -11.073   | chr19      | 3123001          | 3128649        | 5649           | 135              | Upstream TSS       |
| FOXN1       | 1.42x10 <sup>-5</sup> | -10.285   | chr17      | 23867579         | 23870505       | 2927           | 63               | Upstream TSS       |
| FBLN7       | 1.42x10 <sup>-5</sup> | -10.209   | chr2       | 112612054        | 112614829      | 2776           | 68               | Promoter           |
| TTC40       | 1.42x10 <sup>-5</sup> | -10.075   | chr10      | 134525715        | 134528706      | 2992           | 84               | Intron             |
| CCDC57      | 1.42x10 <sup>-5</sup> | -10.070   | chr17      | 77700513         | 77703776       | 3264           | 90               | Intron             |
| PRR26       | 1.42x10 <sup>-5</sup> | -10.026   | chr10      | 682104           | 687304         | 5201           | 144              | Intron             |
| NLRP4       | 1.42x10 <sup>-5</sup> | -9.640    | chr19      | 61052866         | 61055636       | 2771           | 77               | Exon               |
| LINC00574   | 1.42x10 <sup>-5</sup> | -9.277    | chr6       | 169945301        | 169948324      | 3024           | 84               | Downstream CDS end |
| PRKXP1      | 1.42x10 <sup>-5</sup> | -9.260    | chr15      | 98914126         | 98916895       | 2770           | 74               | Exon               |
| TRIM28      | 1.42x10 <sup>-5</sup> | -9.059    | chr19      | 63741516         | 63747134       | 5619           | 123              | Upstream TSS       |
| CNN2        | 1.42x10 <sup>-5</sup> | -9.049    | chr19      | 983366           | 988935         | 5570           | 104              | Exon               |
| MUC6        | 1.42x10 <sup>-5</sup> | -9.046    | chr11      | 1005022          | 1010338        | 5317           | 145              | Exon               |
| MUC12       | 1.42x10 <sup>-5</sup> | -9.030    | chr7       | 100419514        | 100436366      | 16853          | 435              | Exon               |
| LMF1        | 1.42x10 <sup>-5</sup> | -9.006    | chr16      | 950289           | 952101         | 1813           | 38               | Intron             |
| THEG        | 1.42x10 <sup>-5</sup> | -8.675    | chr19      | 330868           | 334483         | 3616           | 90               | Upstream TSS       |
| LINC01061   | 1.42x10 <sup>-5</sup> | -8.510    | chr4       | 120547714        | 120551328      | 3615           | 87               | Promoter           |
| REXO1L2P    | 1.42x10 <sup>-5</sup> | -8.363    | chr8       | 86883906         | 86886596       | 2691           | 73               | Exon               |
| TBC1D2      | 1.42x10 <sup>-5</sup> | -8.245    | chr9       | 100013396        | 100017955      | 4560           | 84               | Exon               |

## B, Comparison N° 2: FBC vs. MBC (10 cases vs. 6 cases; only BRCA cases were considered)

| Gene symbol | P-value               | MAT score | Chromosome | Region start at: | Region end at: | DMR length, bp | Probes in region | DMR position |
|-------------|-----------------------|-----------|------------|------------------|----------------|----------------|------------------|--------------|
| CCDC57      | 1.42x10 <sup>-5</sup> | -15.070   | chr17      | 77700513         | 77703854       | 3342           | 92               | Intron       |
| ERICH1-AS1  | 1.42x10 <sup>-5</sup> | -12.198   | chr8       | 975683           | 982493         | 6811           | 171              | Intron       |
| INF2        | 1.42x10 <sup>-5</sup> | -12.105   | chr14      | 104256668        | 104260009      | 3342           | 74               | Promoter     |
| REXO1L2P    | 1.42x10 <sup>-5</sup> | -12.065   | chr8       | 86883906         | 86886596       | 2691           | 73               | Exon         |
| CRIPAK      | 1.42x10 <sup>-5</sup> | -12.033   | chr4       | 1378294          | 1383307        | 5014           | 131              | Promoter     |
| ZFR2        | 1.42x10 <sup>-5</sup> | -11.173   | chr19      | 3787538          | 3790224        | 2687           | 72               | Intron       |
| S1PR4       | 1.42x10 <sup>-5</sup> | -11.164   | chr19      | 3123001          | 3128649        | 5649           | 135              | Upstream TSS |
| REXO1L1     | 1.42x10 <sup>-5</sup> | -11.155   | chr8       | 86753702         | 86756668       | 2967           | 81               | Exon         |
| REXO1L2P    | 1.42x10 <sup>-5</sup> | -11.109   | chr8       | 86760539         | 86763506       | 2968           | 80               | Exon         |
| CNN2        | 1.42x10 <sup>-5</sup> | -11.072   | chr19      | 983297           | 989018         | 5722           | 108              | Exon         |
| MUC6        | 1.42x10 <sup>-5</sup> | -11.046   | chr11      | 1004902          | 1010303        | 5402           | 147              | Exon         |
| PRKXP1      | 1.42x10 <sup>-5</sup> | -11.006   | chr15      | 98914126         | 98916957       | 2832           | 76               | Exon         |
| FBLN7       | 1.42x10 <sup>-5</sup> | -10.785   | chr2       | 112612093        | 112614829      | 2737           | 67               | Promoter     |
| NLRP4       | 1.42x10 <sup>-5</sup> | -10.451   | chr19      | 61052866         | 61055636       | 2771           | 77               | Exon         |
| B3GNTL1     | 1.42x10 <sup>-5</sup> | -10.313   | chr17      | 78605016         | 78608221       | 3206           | 78               | Upstream TSS |
| ATP9B       | 1.42x10 <sup>-5</sup> | -10.095   | chr18      | 74925996         | 74929037       | 3042           | 73               | Upstream TSS |
| GUSBP1      | 1.42x10 <sup>-5</sup> | -10.057   | chr5       | 21516934         | 21520701       | 3768           | 104              | Intron       |
| MUC12       | 1.42x10 <sup>-5</sup> | -10.037   | chr7       | 100419514        | 100436290      | 16777          | 433              | Exon         |
| TTC40       | 1.42x10 <sup>-5</sup> | -10.029   | chr10      | 134525817        | 134528706      | 2890           | 81               | Intron       |
| PRR26       | 1.42x10 <sup>-5</sup> | -10.001   | chr10      | 682160           | 687379         | 5220           | 144              | Promoter     |

Table SI. Continued.

## C, Comparison N° 3: BRCA1 vs. BRCA2 (16 cases vs. 8 cases)

| Gene symbol | P-value               | MAT score | Chromosome | Region start at: | Region end at: | DMR length, bp | Probes in region | DMR position |
|-------------|-----------------------|-----------|------------|------------------|----------------|----------------|------------------|--------------|
| PLCXD1      | 1.42x10 <sup>-5</sup> | 9.319     | chrX       | 127440           | 132209         | 4770           | 101              | Upstream TSS |
| FAM157B     | 1.42x10 <sup>-5</sup> | 7.770     | chr9       | 140242535        | 140244023      | 1489           | 42               | Exon         |
| AFG3L1P     | 1.42x10 <sup>-5</sup> | 6.079     | chr16      | 88588157         | 88590877       | 2721           | 64               | Intron       |
| ITSN2       | 1.42x10 <sup>-5</sup> | -6.040    | chr2       | 24334126         | 24336975       | 2850           | 69               | Exon         |
| GALNT9      | 1.42x10 <sup>-5</sup> | 6.015     | chr12      | 131261926        | 131263649      | 1724           | 37               | Intron       |
| CCDC135     | 1.42x10 <sup>-5</sup> | 5.556     | chr16      | 56321133         | 56322917       | 1785           | 46               | Promoter     |
| APLP2       | 1.42x10 <sup>-5</sup> | -5.321    | chr11      | 129438343        | 129441002      | 2660           | 61               | Upstream TSS |
| APTIX       | 1.42x10 <sup>-5</sup> | -5.276    | chr9       | 32977115         | 32980828       | 3714           | 83               | Exon         |
| LOC613037   | 1.42x10 <sup>-5</sup> | 5.234     | chr16      | 30141205         | 30144941       | 3737           | 77               | Promoter     |
| ZFP37       | 1.42x10 <sup>-5</sup> | -5.214    | chr9       | 114856371        | 114859470      | 3100           | 88               | Promoter     |
| IGFN1       | 1.42x10 <sup>-5</sup> | -5.162    | chr1       | 199443653        | 199447899      | 4247           | 118              | Exon         |
| ADAM10      | 1.42x10 <sup>-5</sup> | 5.155     | chr15      | 56759920         | 56762787       | 2868           | 65               | Exon         |
| FAM189A2    | 1.42x10 <sup>-5</sup> | -5.153    | chr9       | 71133392         | 71135939       | 2548           | 57               | Intron       |
| PLRG1       | 1.42x10 <sup>-5</sup> | 5.152     | chr4       | 155690184        | 155692920      | 2737           | 67               | Promoter     |
| CTDP1       | 1.42x10 <sup>-5</sup> | -5.142    | chr18      | 75546721         | 75549239       | 2519           | 54               | Intron       |
| PTPRN2      | 1.42x10 <sup>-5</sup> | 5.138     | chr7       | 157844637        | 157847675      | 3039           | 80               | Intron       |
| GABRP       | 1.42x10 <sup>-5</sup> | 5.131     | chr5       | 170142178        | 170144576      | 2399           | 61               | Promoter     |
| PCDHGA8     | 1.42x10 <sup>-5</sup> | 5.131     | chr5       | 140750411        | 140753000      | 2590           | 68               | Intron       |
| MRPL23      | 1.42x10 <sup>-5</sup> | 5.129     | chr11      | 1925752          | 1927547        | 1796           | 50               | Intron       |
| LOC595101   | 1.42x10 <sup>-5</sup> | -5.126    | chr16      | 30251757         | 30253657       | 1901           | 53               | Intron       |

## D, Comparison N° 4: BRCA1 vs. BRCA2 (4 cases vs. 3 cases; only FBC cases were considered)

| Gene symbol | P-value               | MAT score | Chromosome | Region start at: | Region end at: | DMR length, bp | Probes in region | DMR position |
|-------------|-----------------------|-----------|------------|------------------|----------------|----------------|------------------|--------------|
| CDYL        | 8.79x10 <sup>-6</sup> | -8.477    | chr6       | 4754700          | 4755794        | 1095           | 30               | Intron       |
| ZFAND2A     | 8.79x10 <sup>-6</sup> | 7.140     | chr7       | 1164076          | 1165224        | 1149           | 33               | Exon         |
| FBXO25      | 8.79x10 <sup>-6</sup> | 7.087     | chr8       | 353945           | 355490         | 1546           | 42               | Intron       |
| SGMS1       | 8.79x10 <sup>-6</sup> | -6.622    | chr10      | 51762654         | 51763658       | 1005           | 28               | Intron       |
| ARHGEF5     | 8.79x10 <sup>-6</sup> | 6.453     | chr7       | 143685749        | 143686990      | 1242           | 34               | Intron       |
| MX1         | 8.79x10 <sup>-6</sup> | 6.408     | chr21      | 41722008         | 41722744       | 737            | 21               | Intron       |
| CTBP2       | 8.79x10 <sup>-6</sup> | 6.403     | chr10      | 126789339        | 126790616      | 1278           | 36               | Exon         |
| B3GALT1     | 8.79x10 <sup>-6</sup> | -6.389    | chr2       | 168434171        | 168435295      | 1125           | 31               | Exon         |
| OR2F1       | 8.79x10 <sup>-6</sup> | 6.384     | chr7       | 143283723        | 143284996      | 1274           | 36               | Upstream TSS |
| MDGA2       | 8.79x10 <sup>-6</sup> | 6.311     | chr14      | 46885619         | 46887056       | 1438           | 40               | Intron       |
| TPMT        | 8.79x10 <sup>-6</sup> | -6.285    | chr6       | 18261506         | 18262564       | 1059           | 24               | Intron       |
| KLHL2       | 8.79x10 <sup>-6</sup> | 6.283     | chr4       | 166353051        | 166354774      | 1724           | 40               | Intron       |
| TLN1        | 8.79x10 <sup>-6</sup> | 6.253     | chr9       | 35714749         | 35715901       | 1153           | 33               | Exon         |
| CRTAC1      | 8.79x10 <sup>-6</sup> | 6.205     | chr10      | 99781789         | 99782987       | 1199           | 32               | Upstream TSS |
| OR4N2       | 8.79x10 <sup>-6</sup> | -6.187    | chr14      | 19359477         | 19360682       | 1206           | 35               | Upstream TSS |
| AP2B1       | 8.79x10 <sup>-6</sup> | 6.173     | chr17      | 30935333         | 30936071       | 739            | 22               | Upstream TSS |
| MIR628      | 8.79x10 <sup>-6</sup> | 6.155     | chr15      | 53452317         | 53453871       | 1555           | 43               | Intron       |
| ACIN1       | 8.79x10 <sup>-6</sup> | 6.149     | chr14      | 22601032         | 22602646       | 1615           | 42               | Exon         |
| IRG1        | 8.79x10 <sup>-6</sup> | 6.109     | chr13      | 76421863         | 76423193       | 1331           | 37               | Upstream TSS |
| ADARB2      | 8.79x10 <sup>-6</sup> | -6.109    | chr10      | 1731260          | 1734281        | 3022           | 81               | Intron       |

Table SI. Continued.

E, Comparison N° 5: BRCA1 vs. BRCA1X (4 cases vs. 10 cases; only FBC cases were considered)

| Gene symbol | P-value               | MAT score | Chromosome | Region start at: | Region end at: | DMR length, bp | Probes in region | DMR position       |
|-------------|-----------------------|-----------|------------|------------------|----------------|----------------|------------------|--------------------|
| MIR5694     | 8.79x10 <sup>-6</sup> | -7.002    | chr10      | 122343054        | 122344351      | 1298           | 34               | Intron             |
| MRAP        | 8.79x10 <sup>-6</sup> | 6.269     | chr21      | 32594026         | 32595179       | 1154           | 28               | Intron             |
| OR2T5       | 8.79x10 <sup>-6</sup> | -6.245    | chr1       | 246716194        | 246717309      | 1116           | 31               | Upstream TSS       |
| AFG3L1P     | 8.79x10 <sup>-6</sup> | -6.063    | chr16      | 88588573         | 88590063       | 1491           | 42               | Exon/intron        |
| CBFA2T3     | 8.79x10 <sup>-6</sup> | 6.061     | chr16      | 87523232         | 87524291       | 1060           | 25               | Intron             |
| FAM189A2    | 8.79x10 <sup>-6</sup> | 6.052     | chr9       | 71134105         | 71135217       | 1113           | 30               | Exon/intron        |
| ARHGEF10    | 8.79x10 <sup>-6</sup> | 6.029     | chr8       | 1794144          | 1795326        | 1183           | 33               | Intron             |
| CHST4       | 8.79x10 <sup>-6</sup> | -6.028    | chr16      | 70114259         | 70115464       | 1206           | 34               | Upstream TSS       |
| TXNDC12     | 8.79x10 <sup>-6</sup> | -5.957    | chr1       | 52288390         | 52289251       | 862            | 23               | Intron             |
| EI24        | 8.79x10 <sup>-6</sup> | -5.651    | chr11      | 124945252        | 124946388      | 1137           | 29               | Intron             |
| EPSTI1      | 8.79x10 <sup>-6</sup> | -5.493    | chr13      | 42468707         | 42469775       | 1069           | 27               | Upstream TSS       |
| DEFB105B    | 8.79x10 <sup>-6</sup> | -5.341    | chr8       | 7332517          | 7333571        | 1055           | 29               | Promoter           |
| PMCH        | 8.79x10 <sup>-6</sup> | -5.340    | chr12      | 101114188        | 101115210      | 1023           | 28               | Promoter           |
| PRB4        | 8.79x10 <sup>-6</sup> | -5.307    | chr12      | 11357959         | 11358634       | 676            | 19               | Upstream TSS       |
| TMEM44      | 8.79x10 <sup>-6</sup> | 5.290     | chr3       | 195832853        | 195833594      | 742            | 21               | Intron             |
| CNGA1       | 8.79x10 <sup>-6</sup> | -5.267    | chr4       | 47633668         | 47634656       | 989            | 27               | Exon               |
| OR56A1      | 8.79x10 <sup>-6</sup> | -5.247    | chr11      | 6007135          | 6008216        | 1082           | 31               | Upstream TSS       |
| GATA6-AS1   | 8.79x10 <sup>-6</sup> | -5.209    | chr18      | 17996287         | 17997348       | 1062           | 0                | Downstream CDS end |
| CEP72       | 8.79x10 <sup>-6</sup> | 5.203     | chr5       | 682311           | 687015         | 4705           | 115              | Exon               |
| PRKXP1      | 8.79x10 <sup>-6</sup> | 5.201     | chr15      | 98914126         | 98916416       | 2291           | 60               | Exon               |

F, Comparison N° 6: BRCA2 vs. BRCA1X (3 cases vs. 10 cases; only FBC cases were considered)

| Gene symbol | P-value               | MAT score | Chromosome | Region start at: | Region end at: | DMR length, bp | Probes in region | DMR position       |
|-------------|-----------------------|-----------|------------|------------------|----------------|----------------|------------------|--------------------|
| PLRG1       | 8.79x10 <sup>-6</sup> | -8.077    | chr4       | 155690335        | 155691939      | 1605           | 45               | Promoter           |
| CTBP2       | 8.79x10 <sup>-6</sup> | -8.050    | chr10      | 126789266        | 126790650      | 1385           | 39               | Exon               |
| GSTM3       | 8.79x10 <sup>-6</sup> | -7.440    | chr1       | 110081516        | 110082655      | 1140           | 32               | Exon               |
| CDYL        | 8.79x10 <sup>-6</sup> | 7.332     | chr6       | 4754700          | 4755574        | 875            | 24               | Intron             |
| MIR628      | 8.79x10 <sup>-6</sup> | -7.179    | chr15      | 53452152         | 53453871       | 1720           | 47               | Intron             |
| CCDC168     | 8.79x10 <sup>-6</sup> | -7.177    | chr13      | 102186205        | 102187402      | 1198           | 34               | Exon               |
| KLHL2       | 8.79x10 <sup>-6</sup> | -7.164    | chr4       | 166352915        | 166354808      | 1894           | 45               | Intron             |
| MOV10L1     | 8.79x10 <sup>-6</sup> | 7.151     | chr22      | 48946134         | 48947278       | 1145           | 32               | Downstream CDS end |
| CRTAC1      | 8.79x10 <sup>-6</sup> | -7.115    | chr10      | 99781789         | 99782916       | 1128           | 30               | Upstream TSS       |
| ZNF79       | 8.79x10 <sup>-6</sup> | 7.108     | chr9       | 129246102        | 129247147      | 1046           | 30               | Exon               |
| TAF1D       | 8.79x10 <sup>-6</sup> | -7.090    | chr11      | 93109749         | 93110986       | 1238           | 34               | Exon               |
| ARHGEF5     | 8.79x10 <sup>-6</sup> | -7.073    | chr7       | 143685815        | 143686990      | 1176           | 32               | Intron             |
| RABL3       | 8.79x10 <sup>-6</sup> | -7.047    | chr3       | 121889701        | 121890680      | 980            | 27               | Exon               |
| OR2F1       | 8.79x10 <sup>-6</sup> | -7.040    | chr7       | 143283723        | 143285108      | 1386           | 39               | Upstream TSS       |
| GOLGA6C     | 8.79x10 <sup>-6</sup> | -6.798    | chr15      | 73335771         | 73336977       | 1207           | 30               | Upstream TSS       |
| MX1         | 8.79x10 <sup>-6</sup> | -6.638    | chr21      | 41722008         | 41723019       | 1012           | 28               | Intron             |
| MLN         | 8.79x10 <sup>-6</sup> | 6.635     | chr6       | 33877921         | 33879025       | 1105           | 32               | Intron             |
| AP2B1       | 8.79x10 <sup>-6</sup> | -6.579    | chr17      | 30935333         | 30936071       | 739            | 22               | Upstream TSS       |
| ZFAND2A     | 8.79x10 <sup>-6</sup> | -6.505    | chr7       | 1164076          | 1165185        | 1110           | 32               | Exon               |
| MGA         | 8.79x10 <sup>-6</sup> | -6.493    | chr15      | 39829192         | 39830677       | 1486           | 42               | Exon               |

Table SI. Continued.

G, Comparison N° 7: BRCA1 vs. BRCA2/X (4 cases vs. 13 cases; female cases only)

| Gene symbol | P-value               | MAT score | Chromosome | Region start at: | Region end at: | DMR length, bp | Probes in region | DMR position       |
|-------------|-----------------------|-----------|------------|------------------|----------------|----------------|------------------|--------------------|
| TP53TG3     | 7.53x10 <sup>-6</sup> | 5.443     | chr16      | 33111909         | 33112338       | 430            | 24               | Upstream TSS       |
| UBAC2       | 7.53x10 <sup>-6</sup> | -5.336    | chr13      | 98764881         | 98765573       | 693            | 20               | Intron             |
| FBXO11      | 7.53x10 <sup>-6</sup> | 5.314     | chr2       | 47984071         | 47984670       | 600            | 17               | Intron             |
| SGMS1       | 7.53x10 <sup>-6</sup> | 5.244     | chr10      | 51762654         | 51763397       | 744            | 21               | Intron             |
| TCF7        | 7.53x10 <sup>-6</sup> | -5.209    | chr5       | 133479934        | 133480544      | 611            | 18               | Intron             |
| PRB4        | 7.53x10 <sup>-6</sup> | 5.204     | chr12      | 11358179         | 11358634       | 456            | 13               | Upstream TSS       |
| CDYL        | 7.53x10 <sup>-6</sup> | 5.185     | chr6       | 4754700          | 4755723        | 1024           | 28               | Intron             |
| USP48       | 7.53x10 <sup>-6</sup> | -5.151    | chr1       | 21904981         | 21905611       | 631            | 18               | Exon               |
| DEFB105B    | 7.53x10 <sup>-6</sup> | 5.151     | chr8       | 7332672          | 7333423        | 752            | 21               | Exon               |
| ZFAND2A     | 7.53x10 <sup>-6</sup> | -5.144    | chr7       | 1164240          | 1165012        | 773            | 22               | Exon               |
| HP1BP3      | 7.53x10 <sup>-6</sup> | 5.139     | chr1       | 20977158         | 20977742       | 585            | 17               | Intron             |
| UBB         | 7.53x10 <sup>-6</sup> | -5.137    | chr17      | 16225879         | 16226628       | 750            | 21               | Exon               |
| KCNMB2      | 7.53x10 <sup>-6</sup> | 5.133     | chr3       | 179753093        | 179753732      | 640            | 18               | Intron             |
| PPP4R1L     | 7.53x10 <sup>-6</sup> | -5.091    | chr20      | 56240044         | 56240680       | 637            | 18               | Downstream CDS end |
| UBC         | 7.53x10 <sup>-6</sup> | -5.051    | chr12      | 123962214        | 123964416      | 2203           | 60               | Exon               |
| TSPYL5      | 7.53x10 <sup>-6</sup> | 5.037     | chr8       | 98357340         | 98357832       | 493            | 14               | Exon               |
| SAMD3       | 7.53x10 <sup>-6</sup> | 5.031     | chr6       | 130577055        | 130577634      | 580            | 17               | Exon               |
| OR8B4       | 7.53x10 <sup>-6</sup> | 5.023     | chr11      | 123800832        | 123801478      | 647            | 18               | Upstream TSS       |
| OR51F2      | 7.53x10 <sup>-6</sup> | 5.021     | chr11      | 4799954          | 4800486        | 533            | 15               | Promoter           |
| TMEM207     | 7.53x10 <sup>-6</sup> | 5.013     | chr3       | 191653068        | 191653636      | 569            | 16               | Upstream TSS       |

H, comparison N° 8: BRCA2 vs. BRCA1/X (4 cases vs. 14 cases; only FBC cases were considered)

| Gene symbol | P-value               | MAT score | Chromosome | Region start at: | Region end at: | DMR length, bp | Probes in region | DMR position |
|-------------|-----------------------|-----------|------------|------------------|----------------|----------------|------------------|--------------|
| ZFAND2A     | 7.53x10 <sup>-6</sup> | 7.213     | chr7       | 1164240          | 1165012        | 773            | 22               | Exon         |
| NBPF9       | 7.53x10 <sup>-6</sup> | 7.211     | chr1       | 143330003        | 143330634      | 632            | 18               | Intron       |
| CDYL        | 7.53x10 <sup>-6</sup> | -7.124    | chr6       | 4754700          | 4755505        | 806            | 22               | Intron       |
| KLHL2       | 7.53x10 <sup>-6</sup> | 6.743     | chr4       | 166353361        | 166354596      | 1236           | 34               | Intron       |
| SIPA1L2     | 7.53x10 <sup>-6</sup> | 6.563     | chr1       | 230650101        | 230650842      | 742            | 21               | Intron       |
| MIR628      | 7.53x10 <sup>-6</sup> | 6.518     | chr15      | 53452267         | 53453871       | 1605           | 44               | Intron       |
| SNX13       | 7.53x10 <sup>-6</sup> | 6.503     | chr7       | 17948670         | 17949227       | 558            | 15               | Upstream TSS |
| AP2B1       | 7.53x10 <sup>-6</sup> | 6.416     | chr17      | 30935400         | 30936071       | 672            | 20               | Upstream TSS |
| ARHGEF5     | 7.53x10 <sup>-6</sup> | 6.226     | chr7       | 143685994        | 143686769      | 776            | 22               | Intron       |
| ARHGEF35    | 7.53x10 <sup>-6</sup> | 6.218     | chr7       | 143520309        | 143520999      | 691            | 20               | Intron       |
| SERPINB7    | 7.53x10 <sup>-6</sup> | 6.090     | chr18      | 59595459         | 59596058       | 600            | 17               | Intron       |
| APLF        | 7.53x10 <sup>-6</sup> | 6.074     | chr2       | 68549919         | 68550515       | 597            | 17               | Intron       |
| PLRG1       | 7.53x10 <sup>-6</sup> | 6.072     | chr4       | 155691006        | 155691939      | 934            | 27               | Promoter     |
| GOLGA6C     | 7.53x10 <sup>-6</sup> | 6.070     | chr15      | 73335771         | 73336461       | 691            | 20               | Upstream TSS |
| NBPF16      | 7.53x10 <sup>-6</sup> | -6.058    | chr1       | 146848305        | 146848996      | 692            | 20               | Exon         |
| SH3BGR      | 7.53x10 <sup>-6</sup> | 6.042     | chr21      | 39746184         | 39746770       | 587            | 17               | Intron       |
| DPP6        | 7.53x10 <sup>-6</sup> | 6.018     | chr7       | 153375725        | 153376311      | 587            | 16               | Intron       |
| HIGD2B      | 7.53x10 <sup>-6</sup> | 6.012     | chr15      | 70764874         | 70765367       | 494            | 14               | Exon         |
| CTBP2       | 7.53x10 <sup>-6</sup> | 6.008     | chr10      | 126789512        | 126790505      | 994            | 28               | Exon         |
| AGAP9       | 7.53x10 <sup>-6</sup> | 5.791     | chr10      | 47831948         | 47832573       | 626            | 17               | Upstream TSS |

Table SI. Continued.

I, Comparison N° 9: BRCA1 vs. BRCA2 (10 cases vs. 7 cases; only FBC cases were considered)

| Gene symbol | P-value               | MAT score | Chromosome | Region start at: | Region end at: | DMR length, bp | Probes in region | DMR position          |
|-------------|-----------------------|-----------|------------|------------------|----------------|----------------|------------------|-----------------------|
| C1QL2       | 7.53x10 <sup>-6</sup> | 6.063     | chr2       | 119636046        | 119636549      | 504            | 14               | Upstream TSS          |
| AFG3L1P     | 7.53x10 <sup>-6</sup> | -6.004    | chr16      | 88588612         | 88589950       | 1339           | 38               | Exon/Intron           |
| MST1P2      | 7.53x10 <sup>-6</sup> | -5.820    | chr1       | 16853565         | 16854076       | 512            | 15               | Downstream<br>CDS end |
| CBFA2T3     | 7.53x10 <sup>-6</sup> | 5.630     | chr16      | 87523496         | 87524291       | 796            | 22               | Intron                |
| CEP72       | 7.53x10 <sup>-6</sup> | 5.553     | chr5       | 684096           | 684713         | 618            | 17               | Intron                |
| GOLGA6C     | 7.53x10 <sup>-6</sup> | -5.474    | chr15      | 73335771         | 73336461       | 691            | 20               | Upstream TSS          |
| SH3BGR      | 7.53x10 <sup>-6</sup> | -5.378    | chr21      | 39746184         | 39746738       | 555            | 16               | Intron                |
| CRAMP1L     | 7.53x10 <sup>-6</sup> | 5.255     | chr16      | 1661268          | 1661900        | 633            | 18               | Intron                |
| ADAT1       | 7.53x10 <sup>-6</sup> | -5.217    | chr16      | 74212234         | 74212727       | 494            | 14               | Intron                |
| ZNF79       | 7.53x10 <sup>-6</sup> | 5.210     | chr9       | 129246171        | 129247041      | 871            | 25               | Exon                  |
| NSFP1       | 7.53x10 <sup>-6</sup> | 5.205     | chr17      | 42024441         | 42025115       | 675            | 20               | Intron                |
| MLN         | 7.53x10 <sup>-6</sup> | 5.184     | chr6       | 33878221         | 33878726       | 506            | 14               | Intron                |
| ZFR2        | 7.53x10 <sup>-6</sup> | 5.179     | chr19      | 3788248          | 3789265        | 1018           | 29               | Intron                |
| GOLGA6A     | 7.53x10 <sup>-6</sup> | -5.123    | chr15      | 72163443         | 72164089       | 647            | 18               | Upstream TSS          |
| TMEM44      | 7.53x10 <sup>-6</sup> | 5.114     | chr3       | 195832853        | 195833423      | 571            | 16               | Intron                |
| OR4C3       | 7.53x10 <sup>-6</sup> | -5.089    | chr11      | 48301313         | 48301654       | 342            | 10               | Upstream TSS          |
| CEP72       | 7.53x10 <sup>-6</sup> | 5.087     | chr5       | 682521           | 683231         | 711            | 19               | Intron                |
| PLRG1       | 7.53x10 <sup>-6</sup> | -5.066    | chr4       | 155691148        | 155691939      | 792            | 23               | Upstream TSS          |
| SPANXB1     | 7.53x10 <sup>-6</sup> | 5.037     | chrX       | 139923796        | 139924309      | 514            | 15               | Upstream TSS          |
| HIVEP3      | 7.53x10 <sup>-6</sup> | 5.031     | chr1       | 42275837         | 42276401       | 565            | 16               | Upstream TSS          |

CDS, coding sequence; DMRs, differentially methylated regions; FBC, female breast cancer; MAT, model-based analysis of tiling arrays; MBC, male breast cancer; TSS, transcriptional start sites.



Table SII. HUGO Gene Nomenclature Committee classification of the genes identified to be differentially methylated in the different comparisons considered.

| A, FBC vs. MBC            |        |            |
|---------------------------|--------|------------|
| Variable                  | Number | Percentage |
| Total DMR                 | 2846   |            |
| Total genes               | 2486   | 100.00     |
| Protein coding genes      | 2173   | 87.41      |
| Long non coding RNA       | 53     | 2.13       |
| MicroRNA                  | 15     | 0.60       |
| Small nuclear RNA         | 1      | 0.04       |
| Small nucleolar RNA       | 4      | 0.16       |
| Pseudogene                | 108    | 4.34       |
| Complex locus constituent | 2      | 0.08       |
| Protocadherin             | 2      | 0.08       |
| Gene readthrough          | 10     | 0.40       |
| Unknown                   | 118    | 4.75       |

B, FBC vs. MBC (BRCA1 cases only)

| Variable                  | Number | Percentage |
|---------------------------|--------|------------|
| Total DMR                 | 1242   |            |
| Total genes               | 1102   | 100.00     |
| Protein coding genes      | 919    | 83.39      |
| Long non coding RNA       | 22     | 2.00       |
| MicroRNA                  | 8      | 0.73       |
| Small nuclear RNA         | 1      | 0.09       |
| Small nucleolar RNA       | 5      | 0.45       |
| Pseudogene                | 72     | 6.53       |
| Complex locus constituent | 2      | 0.18       |
| Protocadherin             | 2      | 0.18       |
| Readthrough               | 6      | 0.54       |
| Unknown                   | 65     | 5.90       |

C, BRCA1 vs. BRCA2 (FBC cases only)

| Variable             | Number | Percentage |
|----------------------|--------|------------|
| Total DMR            | 364    |            |
| Total genes          | 357    | 100.00     |
| Protein coding genes | 317    | 88.80      |
| Long non coding RNA  | 8      | 2.24       |
| MicroRNA             | 5      | 1.40       |
| Pseudogene           | 12     | 3.36       |
| Protocadherin        | 1      | 0.28       |
| Readthrough          | 1      | 0.28       |
| Unknown              | 13     | 3.64       |

D, BRCA1 vs. BRCA2 (FBC cases only)

| Variable             | Number | Percentage |
|----------------------|--------|------------|
| Total DMR            | 802    |            |
| Total gene           | 755    | 100.00     |
| Protein coding genes | 678    | 89.80      |
| Long non coding RNA  | 19     | 2.52       |
| MicroRNA             | 6      | 0.79       |

Table SII. Continued.

|                     |    |      |
|---------------------|----|------|
| RNA small nucleolar | 1  | 0.13 |
| Pseudogene          | 25 | 3.31 |
| Protocadherin       | 2  | 0.26 |
| Readthrough         | 3  | 0.40 |
| Unknown             | 21 | 2.78 |

E, BRCA1 vs. BRCA2 (FBC cases only)

| Variable             | Number | Percentage |
|----------------------|--------|------------|
| Total DMR            | 484    |            |
| Total genes          | 464    | 100.00     |
| Protein coding genes | 410    | 88.36      |
| Long non coding RNA  | 10     | 2.16       |
| MicroRNA             | 1      | 0.22       |
| Pseudogene           | 20     | 4.31       |
| Protocadherin        | 2      | 0.43       |
| Readthrough          | 2      | 0.43       |
| Unknown              | 19     | 4.09       |

F, BRCA2 vs. BRCA1 (FBC cases only)

| Variable             | Number | Percentage |
|----------------------|--------|------------|
| Total DMR            | 673    |            |
| Total genes          | 629    | 100.00     |
| Protein coding genes | 561    | 89.19      |
| Long non coding RNA  | 19     | 3.02       |
| MicroRNA             | 4      | 0.64       |
| Pseudogene           | 15     | 2.38       |
| Readthrough          | 3      | 0.48       |
| Unknown              | 27     | 4.29       |

G, BRCA2/X vs. BRCA1 (FBC cases only)

| Variable                  | Number | Percentage |
|---------------------------|--------|------------|
| Total DMR                 | 861    |            |
| Total genes               | 819    | 100.00     |
| Protein coding genes      | 736    | 89.87      |
| Long non coding RNA       | 21     | 2.56       |
| MicroRNA                  | 2      | 0.24       |
| RNA small nucleolar       | 1      | 0.12       |
| Pseudogene                | 28     | 3.42       |
| complex locus constituent | 1      | 0.12       |
| Protocadherin             | 1      | 0.12       |
| Readthrough               | 5      | 0.61       |
| Unknown                   | 24     | 2.93       |

H, BRCA1/X vs. BRCA2 (FBC cases only)

| Variable             | Number | Percentage |
|----------------------|--------|------------|
| Total DMR            | 1380   |            |
| Total genes          | 1251   | 100.00     |
| Protein coding genes | 1121   | 89.61      |
| Long non coding RNA  | 35     | 2.80       |
| MicroRNA             | 4      | 0.32       |
| RNA small nucleolar  | 1      | 0.08       |



Table SII. Continued.

|                           |    |      |
|---------------------------|----|------|
| Pseudogene                | 39 | 3.12 |
| complex locus constituent | 1  | 0.08 |
| Protocadherin             | 2  | 0.16 |
| Readthrough               | 6  | 0.48 |
| Unknown                   | 42 | 3.36 |

## I, BRCA1/2 vs. BRCA1 (FBC cases only)

| Variable             | Number | Percentage |
|----------------------|--------|------------|
| Total DMR            | 962    |            |
| Total gene           | 914    | 100.00     |
| Protein coding genes | 820    | 89.72      |
| Long non coding RNA  | 33     | 3.61       |
| MicroRNA             | 5      | 0.55       |
| RNA small nucleolar  | 2      | 0.22       |
| Pseudogene           | 23     | 2.52       |
| Protocadherin        | 1      | 0.11       |
| Readthrough          | 4      | 0.44       |
| Unknown              | 26     | 2.84       |

DMRs, differentially methylated regions; FBC, female breast cancer; MBC, male breast cancer.

Table SIII. Analysis of the association between the clinicopathological characteristics of patients with breast cancer and the DNA methylation levels of KRT genes<sup>a</sup>.

| Variable                              | KRT1   |     | KRT6A  |     | KRT14              |     | KRT75              |     | KRT78 (i) |     | KRT78 (ii) |     | KRT80 |     | KRT81              |     | KRT86              |     |                    |
|---------------------------------------|--------|-----|--------|-----|--------------------|-----|--------------------|-----|-----------|-----|------------|-----|-------|-----|--------------------|-----|--------------------|-----|--------------------|
|                                       | High   | Low | High   | Low | High               | Low | High               | Low | High      | Low | High       | Low | High  | Low | High               | Low | High               | Low |                    |
| <b>ER status</b>                      |        |     |        |     |                    |     |                    |     |           |     |            |     |       |     |                    |     |                    |     |                    |
| Positive, n                           | 6      | 9   | 5      | 10  | 5                  | 10  | 7                  | 8   | 6         | 9   | 5          | 10  | 6     | 9   | 5                  | 10  | 5                  | 10  | 10                 |
| Negative, n                           | 3      | 2   | 3      | 2   | 4                  | 1   | 3                  | 2   | 3         | 2   | 3          | 2   | 3     | 2   | 4                  | 1   | 4                  | 1   | 1                  |
| P-value                               | 0.617  |     | 0.347  |     | 0.127              |     | >0.999             |     | 0.617     |     | 0.347      |     | 0.617 |     | 0.127              |     | 0.127              |     | 0.127              |
| <b>PR status</b>                      |        |     |        |     |                    |     |                    |     |           |     |            |     |       |     |                    |     |                    |     |                    |
| Positive, n                           | 4      | 9   | 3      | 10  | 3                  | 10  | 5                  | 8   | 4         | 9   | 4          | 9   | 4     | 9   | 3                  | 10  | 3                  | 10  | 10                 |
| Negative, n                           | 5      | 2   | 5      | 2   | 6                  | 1   | 5                  | 2   | 5         | 2   | 4          | 3   | 4     | 2   | 6                  | 1   | 6                  | 1   | 1                  |
| P-value                               | 0.160  |     | 0.062  |     | 0.017 <sup>b</sup> |     | 0.350              |     | 0.160     |     | 0.356      |     | 0.160 |     | 0.017 <sup>b</sup> |     | 0.017 <sup>b</sup> |     | 0.017 <sup>b</sup> |
| <b>HER2 status</b>                    |        |     |        |     |                    |     |                    |     |           |     |            |     |       |     |                    |     |                    |     |                    |
| Positive, n                           | 4      | 2   | 3      | 3   | 3                  | 3   | 5                  | 1   | 4         | 2   | 2          | 4   | 5     | 1   | 4                  | 2   | 4                  | 2   | 2                  |
| Negative, n                           | 4      | 8   | 5      | 7   | 6                  | 6   | 5                  | 7   | 5         | 7   | 6          | 6   | 4     | 8   | 5                  | 7   | 5                  | 7   | 7                  |
| P-value                               | 0.321  |     | >0.999 |     | >0.999             |     | 0.151              |     | 0.620     |     | 0.638      |     | 0.131 |     | 0.620              |     | 0.620              |     | 0.620              |
| <b>Ki67 status</b>                    |        |     |        |     |                    |     |                    |     |           |     |            |     |       |     |                    |     |                    |     |                    |
| Positive, n                           | 5      | 5   | 4      | 6   | 6                  | 4   | 6                  | 4   | 5         | 5   | 6          | 4   | 6     | 4   | 6                  | 4   | 6                  | 4   | 4                  |
| Negative, n                           | 4      | 5   | 4      | 5   | 3                  | 6   | 4                  | 5   | 4         | 5   | 2          | 7   | 3     | 6   | 3                  | 6   | 3                  | 6   | 6                  |
| P-value                               | >0.999 |     | >0.999 |     | 0.370              |     | 0.656              |     | >0.999    |     | 0.170      |     | 0.370 |     | 0.370              |     | 0.370              |     | 0.370              |
| <b>Molecular subtypes<sup>c</sup></b> |        |     |        |     |                    |     |                    |     |           |     |            |     |       |     |                    |     |                    |     |                    |
| Luminal A, n                          | 3      | 7   | 3      | 7   | 3                  | 7   | 3                  | 7   | 3         | 7   | 4          | 6   | 2     | 8   | 2                  | 8   | 2                  | 8   | 8                  |
| Luminal B, n                          | 2      | 2   | 1      | 3   | 1                  | 3   | 3                  | 1   | 1         | 3   | 2          | 2   | 3     | 1   | 2                  | 2   | 2                  | 2   | 2                  |
| HER2-positive, n                      | 2      | 0   | 2      | 0   | 2                  | 0   | 2                  | 0   | 2         | 0   | 1          | 1   | 2     | 0   | 2                  | 0   | 2                  | 0   | 0                  |
| Triple negative, n                    | 2      | 2   | 2      | 2   | 3                  | 1   | 2                  | 2   | 2         | 2   | 2          | 2   | 2     | 2   | 3                  | 1   | 3                  | 1   | 1                  |
| P-value                               | 0.651  |     | 0.175  |     | 0.288              |     | 0.044 <sup>b</sup> |     | 0.081     |     | 0.837      |     | 0.390 |     | 0.655              |     | 0.130              |     | 0.130              |

<sup>a</sup>The DNA methylation level of KRT genes was categorized into two groups: High DNA methylation level and low DNA methylation level. The median of  $\Delta$  methylation values was selected as the cut-off point. Fisher's exact test was used to determine the statistical significance between two categorical variables. <sup>b</sup>P<0.05. <sup>c</sup>One-way ANOVA and Tukey's pairwise comparison tests were used to determine the statistical differences of mean  $\Delta$  methylation values among the different molecular subtypes. Two differentially methylated regions were detected for KRT78 gene, indicated as (i) and (ii). ER, estrogen receptor; KRT, keratin; PR, progesterone receptor.

Table SIV. Significantly enriched annotation terms found by DAVID in the performed comparisons.

## A, Significant enriched annotation terms found by DAVID in FBC vs. MBC comparison (only BRCA cases were considered)

| Category | Term                                                                  | Genes                                                                                                                                                                                                                                                                                                                                                           | Count | P-value  | Benjamini |
|----------|-----------------------------------------------------------------------|-----------------------------------------------------------------------------------------------------------------------------------------------------------------------------------------------------------------------------------------------------------------------------------------------------------------------------------------------------------------|-------|----------|-----------|
| GO: BP   | GO:0051056<br>regulation of small GTPase mediated signal transduction | ABR, AGAP3, AGAP6, AGAP9, ARAP1, ARAP3, ARFGAP3, ARHGEF10, ARHGEF16, ARHGEF3, ARHGEF5, DGKZ, EPO, GMIP, HRAS, IQSEC1, KNDC1, LPAR2, NUP62, RAPGEF3, RASA3, RASA4CP, RASGRP2, RGL2, TBC1D16, TBC1D2, TBC1D22A, TBC1D25, TBC1D29, TBC1D3B, TBC1D3F, TBC1D3G, TIAM2, USP6                                                                                          | 34    | 0.000368 | 0.010     |
| GO: MF   | GO:0030695<br>GTPase regulator activity                               | ABR, AGAP3, AGAP6, AGAP9, ARAP1, ARAP3, ARFGAP3, ARHGAP11B, ARHGAP23, ARHGAP35, ARHGAP40, ARHGEF10, ARHGEF16, ARHGEF3, ARHGEF5, BCRP2, DOCK2, DOCK6, GMIP, IQSEC1, KNDC1, MYO9B, RAPGEF3, RASA3, RASA4CP, RASGRP2, RGL2, RGS12, RPH3AL, SH3BP1, SRGAP1, SYTL2, SYTL3, TBC1D16, TBC1D2, TBC1D22A, TBC1D25, TBC1D29, TBC1D3B, TBC1D3F, TBC1D3G, TIAM2, USP6       | 43    | 0.000530 | 0.011     |
| GO: MF   | GO:0060589<br>nucleoside-triphosphatase regulator activity            | ABR, AGAP3, AGAP6, AGAP9, AHS2, ARAP1, ARAP3, ARFGAP3, ARHGAP11B, ARHGAP23, ARHGAP35, ARHGAP40, ARHGEF10, ARHGEF16, ARHGEF3, ARHGEF5, BCRP2, DOCK2, DOCK6, GMIP, IQSEC1, KNDC1, MYO9B, RAPGEF3, RASA3, RASA4CP, RASGRP2, RGL2, RGS12, RPH3AL, SH3BP1, SRGAP1, SYTL2, SYTL3, TBC1D16, TBC1D2, TBC1D22A, TBC1D25, TBC1D29, TBC1D3B, TBC1D3F, TBC1D3G, TIAM2, USP6 | 44    | 0.000404 | 0.011     |
| GO: MF   | GO:0060090<br>molecular adaptor activity                              | ANK1, BAIAP2, BAIAP2L1, BAIAP2L2, EPO, GAB1, GRAP, GRB7, KHDRBS1, MTSS1L, OBSL1, PDCD6, SH3BP2, SRC                                                                                                                                                                                                                                                             | 14    | 0.000339 | 0.014     |
| GO: MF   | GO:0005096<br>GTPase activator activity                               | ABR, AGAP3, AGAP6, AGAP9, ARAP1, ARAP3, ARFGAP3, ARHGAP11B, ARHGAP23, ARHGAP35, ARHGAP40, BCRP2, DOCK2, GMIP, MYO9B, RASA3, RASA4CP, RGS12, SH3BP1, SRGAP1, TBC1D16, TBC1D2, TBC1D22A, TBC1D25, TBC1D29, TBC1D3B, TBC1D3F, TBC1D3G, TIAM2, USP6                                                                                                                 | 30    | 0.000205 | 0.017     |
| GO: MF   | GO:0008047<br>enzyme activator activity                               | ABR, AGAP3, AGAP6, AGAP9, AHS2, ARAP1, ARAP3, ARFGAP3, ARHGAP11B, ARHGAP23, ARHGAP35, ARHGAP40, BCRP2, CTAGE9, DOCK2, GHRL, GMIP, GUCA1A, IGF3, MMP16, MYO9B, RASA3, RASA4CP, RGS12, SH3BP1, SRGAP1, TBC1D16, TBC1D2, TBC1D22A, TBC1D25, TBC1D29, TBC1D3B, TBC1D3F, TBC1D3G, TIAM2, USP6                                                                        | 36    | 0.000236 | 0.038     |
| GO: MF   | GO:0008093<br>cytoskeletal adaptor activity                           | ANK1, BAIAP2, BAIAP2L1, BAIAP2L2, MTSS1L, OBSL1                                                                                                                                                                                                                                                                                                                 | 6     | 0.000339 | 0.045     |
| GO: BP   | GO:0046578<br>regulation of Ras protein signal transduction           | ABR, AGAP3, AGAP6, AGAP9, ARAP1, ARAP3, ARFGAP3, ARHGEF10, ARHGEF16, ARHGEF3, ARHGEF5, DGKZ, EPO, GMIP, HRAS, IQSEC1, LPAR2, NUP62, TBC1D16, TBC1D2, TBC1D22A, TBC1D25, TBC1D29, TBC1D3B, TBC1D3F, TBC1D3G, TIAM2, USP6                                                                                                                                         | 28    | 0.000530 | 0.071     |

Table SIV. Continued.

## B, Significant enriched annotation terms found by DAVID in BRCA1 vs. BRCA2 comparison (only FBC cases were considered)

| Category | Term                                                  | Genes                                                                                                                                                                                                                                                                                                   | Count | P-value  | Benjamini |
|----------|-------------------------------------------------------|---------------------------------------------------------------------------------------------------------------------------------------------------------------------------------------------------------------------------------------------------------------------------------------------------------|-------|----------|-----------|
| GO: MF   | GO:0019787: small conjugating protein ligase activity | ATG3 <sup>a</sup> , FBXO11 <sup>a</sup> , FBXO25, FBXO3 <sup>a</sup> , FBXO4 <sup>a</sup> , MALT1 <sup>a</sup> , NEDD4 <sup>a</sup> , NEDD4L, RBBP6 <sup>a</sup> , RNF128, RNF6 <sup>a</sup> , UBE2G1 <sup>a</sup> , UBE2MP1 <sup>a</sup> , UBE2S, UBE2T, UBE4A <sup>a</sup> , UHRF2, WWP1 <sup>a</sup> | 18    | 0.000147 | 0.05      |

## C, Significant enriched annotation terms by DAVID in BRCA1 vs. BRCA2 comparison (only FBC cases were considered).

| Category | Term                                                               | Genes                                                                                                                                                                                                                                                                                              | Count | P-value  | Benjamini |
|----------|--------------------------------------------------------------------|----------------------------------------------------------------------------------------------------------------------------------------------------------------------------------------------------------------------------------------------------------------------------------------------------|-------|----------|-----------|
| GO: BP   | GO:0051240 positive regulation of multicellular organismal process | AGT <sup>a</sup> , BMPR2 <sup>a</sup> , CD40LG <sup>a</sup> , CHRM3, CPS1 <sup>a</sup> , GRIK1 <sup>a</sup> , IL20RB, LGI1 <sup>a</sup> , NMU <sup>a</sup> , PEX5 <sup>a</sup> , PMCH <sup>a</sup> , RARA, SLC1A3 <sup>a</sup> , SLC24A2 <sup>a</sup> , SMAD3, TPM1 <sup>a</sup> , TRAF2, UBB, UBC | 19    | 0.000163 | 0.032     |

## D, Significant enriched annotation terms found by DAVID in BRCA2 vs. BRCA2 comparison (only FBC cases were considered)

| Category     | Term                                                    | Genes                                                                                                                                                                                                                                                                                                                                                                                                                                                                                     | Count | P-value  | Benjamini |
|--------------|---------------------------------------------------------|-------------------------------------------------------------------------------------------------------------------------------------------------------------------------------------------------------------------------------------------------------------------------------------------------------------------------------------------------------------------------------------------------------------------------------------------------------------------------------------------|-------|----------|-----------|
| KEGG pathway | hsa05220 Chronic myeloid leukemia                       | AKT2, CDKN1B, CTBP2 <sup>a</sup> , E2F3 <sup>a</sup> , GAB2 <sup>a</sup> , GRB2 <sup>a</sup> , LOC407835 <sup>a</sup> , PIK3R1, PIK3R3 <sup>a</sup> , SHC2                                                                                                                                                                                                                                                                                                                                | 10    | 0.000278 | 0.0372    |
| GO: MF       | GO:0008047 enzyme activator activity                    | AFAP1L2, AGAP4 <sup>a</sup> , AGAP9 <sup>a</sup> , APOA4, ARHGAP17, ARHGAP42, ARHGAP44 <sup>a</sup> , ARHGAP5, ARHGAP6 <sup>a</sup> , BNIP2, FAM13B, FRS2 <sup>a</sup> , IGF1BP3, ITSN1, MALT1, PRLR <sup>a</sup> , RALGAPA2, RALGAPB <sup>a</sup> , RASAL1, RGS12 <sup>a</sup> , SIPA1L2 <sup>a</sup> , STARD13 <sup>a</sup> , TBC1D2, TBC1D25, TBC1D31 <sup>a</sup>                                                                                                                     | 25    | 0.000177 | 0.0378    |
| GO: MF       | GO:0060589 nucleoside-triphosphatase regulator activity | AGAP4 <sup>a</sup> , AGAP9 <sup>a</sup> , ANXA2 <sup>a</sup> , ARHGAP17, ARHGAP42, ARHGAP44 <sup>a</sup> , ARHGAP5, ARHGAP6 <sup>a</sup> , ARHGEF10, ARHGEF5 <sup>a</sup> , BNIP2, CDC42SE1 <sup>a</sup> , FAM13B, FER <sup>a</sup> , ITSN1, ITSN2, PSD3 <sup>a</sup> , RALGAPA2, RALGAPB <sup>a</sup> , RASAL1, RASGRF2 <sup>a</sup> , RGS12 <sup>a</sup> , SIPA1L2 <sup>a</sup> , STARD13 <sup>a</sup> , SYTL4 <sup>a</sup> , TBC1D2, TBC1D25, TBC1D31 <sup>a</sup> , TNIK <sup>a</sup> | 29    | 0.000146 | 0.0466    |

## E, Significant enriched annotation terms found by DAVID in BRCA1 vs. BRCA2/X comparison (only FBC cases were considered)

| Category | Term                                    | Genes                                                                                                                                                                                                                                                                                                                                                                                                                                                                                                                                                                                                                                                                         | Count | P-value  | Benjamini |
|----------|-----------------------------------------|-------------------------------------------------------------------------------------------------------------------------------------------------------------------------------------------------------------------------------------------------------------------------------------------------------------------------------------------------------------------------------------------------------------------------------------------------------------------------------------------------------------------------------------------------------------------------------------------------------------------------------------------------------------------------------|-------|----------|-----------|
| GO: MF   | GO:0008092 cytoskeletal protein binding | AATF <sup>a</sup> , ANG <sup>a</sup> , CALD1, CCDC88A, CENPJ <sup>a</sup> , CLASP1, CLMN <sup>a</sup> , CNN3 <sup>a</sup> , DAAM2 <sup>a</sup> , DIXDC1 <sup>a</sup> , DYNLL2, EZR <sup>a</sup> , FMN2, FRMD3, GABARAPL1 <sup>a</sup> , IQGAP2, KLHL2 <sup>a</sup> , LIMCH1 <sup>a</sup> , LMO7 <sup>a</sup> , MAPRE1 <sup>a</sup> , MKL2 <sup>a</sup> , MTUS2, MYH3, MYO16 <sup>a</sup> , MYO1H <sup>a</sup> , MYO3A <sup>a</sup> , PACSIN2, PALLD <sup>a</sup> , PKD2 <sup>a</sup> , PRNP, RAB11FIP5 <sup>a</sup> , RAB27A <sup>a</sup> , SSH1 <sup>a</sup> , SYNE1, SYNE2 <sup>a</sup> , TLN1 <sup>a</sup> , TMOD3 <sup>a</sup> , TMOD4, TNNI3K, TPM1 <sup>a</sup> , VPS41 | 41    | 0.000648 | 0.0477    |

## F, Significant enriched annotation terms found by DAVID in BRCA2 vs. BRCA1/X comparison (only FBC cases were considered)

| Category     | Term                                       | Genes                                                                                                                                                                                                                                   | Count | P-value  | Benjamini |
|--------------|--------------------------------------------|-----------------------------------------------------------------------------------------------------------------------------------------------------------------------------------------------------------------------------------------|-------|----------|-----------|
| KEGG pathway | hsa04660 T cell receptor signaling pathway | AKT2 <sup>a</sup> , CD40LG <sup>a</sup> , CD8B <sup>a</sup> , FYN <sup>a</sup> , GRB2, IL10, LOC407835, MALT1 <sup>a</sup> , MAPK9, NCK2 <sup>a</sup> , NFATC2 <sup>a</sup> , NRAS, PIK3CA, PIK3CG, PIK3R1 <sup>a</sup> , PIK3R3, PTPRC | 17    | 0.000106 | 0.0346    |
| KEGG pathway | hsa05214 Glioma                            | AKT2 <sup>a</sup> , CALM2, CAMK2A <sup>a</sup> , E2F3, GRB2, LOC407835, NRAS, PIK3CA, PIK3CG, PIK3R1 <sup>a</sup> , PIK3R3, SHC2 <sup>a</sup> , TGFA                                                                                    | 13    | 0.000430 | 0.0350    |

Table SIV. Continued.

| Category     | Term                                    | Genes                                                                                                                                                                                                                                                  | Count | P-value  | Benjamini |
|--------------|-----------------------------------------|--------------------------------------------------------------------------------------------------------------------------------------------------------------------------------------------------------------------------------------------------------|-------|----------|-----------|
| KEGG pathway | hsa05213 Endometrial cancer             | AKT2 <sup>a</sup> , FOXO3B <sup>a</sup> , GRB2, ILK, LOC407835, NRAS, PIK3CA, PIK3CG, PIK3R1 <sup>a</sup> , PIK3R3, TCF7 <sup>a</sup>                                                                                                                  | 11    | 0.000136 | 0.0368    |
| KEGG pathway | hsa04012 ErbB signaling pathway         | AKT2 <sup>a</sup> , CAMK2A <sup>a</sup> , GRB2, HBEGF, LOC407835, MAPK9, NCK2 <sup>a</sup> , NRAS, PIK3CA, PIK3CG, PIK3R1 <sup>a</sup> , PIK3R3, SHC2 <sup>a</sup> , STAT5B, TGFA                                                                      | 15    | 0.000925 | 0.0376    |
| KEGG pathway | hsa04722 Neurotrophin signaling pathway | AKT2 <sup>a</sup> , CALM2, CAMK2A <sup>a</sup> , CSK, FOXO3B <sup>a</sup> , FRS2, GRB2, LOC407835, MAP2K5 <sup>a</sup> , MAPK9, MAPKAPK2, NRAS, PIK3CA, PIK3CG, PIK3R1 <sup>a</sup> , PIK3R3, RPS6KA2 <sup>a</sup> , SHC2 <sup>a</sup> , YWHAB, ZNF274 | 20    | 0.000239 | 0.0389    |
| KEGG pathway | hsa05220 Chronic myeloid leukemia       | ACVR1B, AKT2 <sup>a</sup> , CTBP2, E2F3, GRB2, HDAC2 <sup>a</sup> , LOC407835, NRAS, PIK3CA, PIK3CG, PIK3R1 <sup>a</sup> , PIK3R3, SHC2 <sup>a</sup> , STAT5B                                                                                          | 14    | 0.000763 | 0.0413    |
| KEGG pathway | hsa05223 Non-small cell lung cancer     | AKT2 <sup>a</sup> , E2F3, FOXO3B <sup>a</sup> , GRB2, LOC407835, NRAS, PIK3CA, PIK3CG, PIK3R1 <sup>a</sup> , PIK3R3, TGFA                                                                                                                              | 11    | 0.000183 | 0.0425    |

G, Significant enriched annotation terms found by DAVID in BRCA1 vs. BRCA2 comparison (only FBC cases were considered)

| Category | Term                                                     | Genes                                                                                                                                                                                                                                                                                                                                                                                                                                                                                                                                                                                                                                 | Count | P-value  | Benjamini |
|----------|----------------------------------------------------------|---------------------------------------------------------------------------------------------------------------------------------------------------------------------------------------------------------------------------------------------------------------------------------------------------------------------------------------------------------------------------------------------------------------------------------------------------------------------------------------------------------------------------------------------------------------------------------------------------------------------------------------|-------|----------|-----------|
| GO: MF   | GO:0030695: GTPase regulator activity                    | AGAP9 <sup>a</sup> , ANXA2 <sup>a</sup> , ARFGAP3, ARHGAP11A <sup>a</sup> , ARHGAP23, ARHGAP32 <sup>a</sup> , ARHGAP5, ARHGAP6 <sup>a</sup> , ARHGAP9, ARHGEF10, ARHGEF12 <sup>a</sup> , ARHGEF5 <sup>a</sup> , ASAP1 <sup>a</sup> , BNIP2, CHN2 <sup>a</sup> , DOCK3, HERC1 <sup>a</sup> , IQSEC3, KNDC1, MCF2L <sup>a</sup> , MYO9B, PREX1 <sup>a</sup> , PRR5, PRR5-ARHGAP8, RALGAPA2, RAPGEF3 <sup>a</sup> , RASA4CP <sup>a</sup> , RASGRF1, RIMS2 <sup>a</sup> , SIPA1L2 <sup>a</sup> , TBC1D15 <sup>a</sup> , TBC1D16, TBC1D25, TBC1D31 <sup>a</sup> , TBC1D3B, TBC1D3F, TBC1D8, TNIK <sup>a</sup> , TRIO                       | 37    | 0.000546 | 0.0210086 |
| GO: MF   | GO:0005096: GTPase activator activity                    | AGAP9 <sup>a</sup> , ARFGAP3, ARHGAP11A <sup>a</sup> , ARHGAP23, ARHGAP32 <sup>a</sup> , ARHGAP5, ARHGAP6 <sup>a</sup> , ARHGAP9, ARHGEF12 <sup>a</sup> , ASAP1 <sup>a</sup> , BNIP2, CHN2 <sup>a</sup> , MYO9B, PREX1 <sup>a</sup> , PRR5, PRR5-ARHGAP8, RALGAPA2, RASA4CP <sup>a</sup> , SIPA1L2, TBC1D15 <sup>a</sup> , TBC1D16, TBC1D25, TBC1D31 <sup>a</sup> , TBC1D3B, TBC1D3F, TBC1D8                                                                                                                                                                                                                                          | 24    | 0.000107 | 0.0273196 |
| GO: MF   | GO:0060589: nucleoside-triphosphatase regulator activity | AGAP9 <sup>a</sup> , ANXA2 <sup>a</sup> , ARFGAP3, ARHGAP11A <sup>a</sup> , ARHGAP23, ARHGAP32 <sup>a</sup> , ARHGAP5, ARHGAP6 <sup>a</sup> , ARHGAP9, ARHGEF10, ARHGEF12 <sup>a</sup> , ARHGEF5 <sup>a</sup> , ASAP1 <sup>a</sup> , BNIP2, CHN2 <sup>a</sup> , DOCK3, GRPEL2 <sup>a</sup> , HERC1 <sup>a</sup> , IQSEC3, KNDC1, MCF2L <sup>a</sup> , MYO9B, PREX1 <sup>a</sup> , PRR5, PRR5-ARHGAP8, RALGAPA2, RAPGEF3 <sup>a</sup> , RASA4CP <sup>a</sup> , RASGRF1, RIMS2 <sup>a</sup> , SIPA1L2 <sup>a</sup> , TBC1D15 <sup>a</sup> , TBC1D16, TBC1D25, TBC1D31 <sup>a</sup> , TBC1D3B, TBC1D3F, TBC1D8, TNIK <sup>a</sup> , TRIO | 38    | 0.000387 | 0.0296572 |

<sup>a</sup>Hypomethylated genes reporting a negative MAT-score. GO, Gene Ontology; BP, Biological Process; MF, Molecular Function; FBC, female breast cancer; MBC, male breast cancer; DAVID, Database for Annotation, Visualization and Integrated Discovery.
